# Supplementary material for: Redox and Hormonal Changes in the Transcriptome of Grape (Vitis vinifera) Berries during Natural Noble Rot Development
Source: MDPI journal article supplement (doi:10.3390/plants11070864), 2022-03-24
Supplement: s1 [file s1]

**Supplemental Table S2.** RNA-Seq validation: primer sequences and Real-time RT-PCR parameters.

| Gene Ensembl ID          | Primer sequence                   | Real-time RT-PCR parameter                                |                           |
|--------------------------|-----------------------------------|-----------------------------------------------------------|---------------------------|
| <i>Bcin08g00340</i>      | Forward 5' - CGGTTCCCTCAGTTTTGTGT | Polymerase activation and denaturation:<br>95 °C<br>2 min | Number of cycles used: 40 |
|                          | Reverse 5' - CGAGACTGAATAACGCGACA |                                                           |                           |
| <i>Bcin13g02250</i>      | Forward 5' - TAGGTGACGGCCATTGTGTA |                                                           |                           |
|                          | Reverse 5' - CGAATACTCCCCGAAACAAA |                                                           |                           |
| <i>Bcin13g02210</i>      | Forward 5' - CAGTGCTACCCTTACACCGT | Denaturation:<br>95 °C<br>10 sec                          |                           |
|                          | Reverse 5' - AGAGTAAGGTTGGGGTCGGT |                                                           |                           |
| <i>Bcin14g03170</i>      | Forward 5' - CATTGCCAATATGGATGCTG |                                                           |                           |
|                          | Reverse 5' - TTGAAGTGCGTTGCTACACC |                                                           |                           |
| <i>Bcin04g00060</i>      | Forward 5' - CCTCAGAAGGCACCTCACAA |                                                           |                           |
|                          | Reverse 5' - GCCCAAGGTTCGCCATTAGA |                                                           |                           |
| <i>VIT_07s0151g00130</i> | Forward 5' - AGCAGCAGTCACAAATTGGC |                                                           |                           |
|                          | Reverse 5' - GGGCTGAGAAGTTGAGGGAT |                                                           |                           |
| <i>VIT_07s0005g00740</i> | Forward 5' - TCATCACTGCCCTCAATTGC | Annealing and extention:<br>60 °C<br>30 sec               |                           |
|                          | Reverse 5' - GTCGATGGCTCTGATTGCTC |                                                           |                           |
| <i>VIT_07s0141g00690</i> | Forward 5' - TAGGTTGGATGCGGTGGATT |                                                           |                           |
|                          | Reverse 5' - TCACCATCAAGCTTCGGAGA |                                                           |                           |
| <i>VIT_06s0004g05700</i> | Forward 5' - GCGAGAGGAAGCGATTGAAG |                                                           |                           |
|                          | Reverse 5' - AGGCTCCCAACCGAACTTTA |                                                           |                           |
| <i>VIT_05s0062g00310</i> | Forward 5' - TTGGAACCAGAGGCCCTAAG |                                                           |                           |
|                          | Reverse 5' - TGCTTTGATAACACCGCGAG |                                                           |                           |

**Supplemental Table S3.** Real-time RT-PCR verification of RNA-Seq results. Transcript abundance fold-changes between healthy and noble rot-affected Furmint samples are shown after log<sub>2</sub> transformation.

|                          | Consecutive stages of noble rot |                  |             |                  |             |                  |
|--------------------------|---------------------------------|------------------|-------------|------------------|-------------|------------------|
|                          | I.                              |                  | II.         |                  | III.        |                  |
|                          | RNA-Seq                         | Real-time RT-PCR | RNA-Seq     | Real-time RT-PCR | RNA-Seq     | Real-time RT-PCR |
| <i>VIT_07s0141g00690</i> | 5.08                            | 4.80             | 6.00        | 6.06             | 5.31        | 4.64             |
| <i>VIT_06s0004g05700</i> | 4.06                            | 4.13             | 4.62        | 4.29             | 4.85        | 4.29             |
| <i>VIT_05s0062g00310</i> | 6.79                            | 6.88             | 7.52        | 7.31             | 6.75        | 5.22             |
| <i>VIT_07s0151g00130</i> | 3.41                            | 4.74             | 3.44        | 4.86             | -0.14       | 0.29             |
| <i>VIT_07s0005g00740</i> | 4.88                            | 5.98             | 5.51        | 6.76             | 3.44        | 3.57             |
| <i>BCIN_08g00340</i>     | 4.43                            | 3.74             | 4.85        | 4.86             | 1.56        | 3.11             |
| <i>BCIN_13g02250</i>     | 4.16                            | 4.64             | 4.05        | 4.65             | 2.74        | 4.49             |
| <i>BCIN_13g02210</i>     | 2.84                            | 1.64             | 3.47        | 2.19             | 2.24        | 1.86             |
| <i>BCIN_14g03170</i>     | 3.54                            | 3.91             | 3.27        | 3.54             | 2.33        | 2.85             |
| <i>BCIN_04g00060</i>     | 0.61                            | -1.91            | 1.93        | 0.17             | 4.67        | 3.38             |
| <b>Correlation</b>       | <b>0.93</b>                     |                  | <b>0.90</b> |                  | <b>0.85</b> |                  |

**Supplemental Table S4.** Details of targeted abscisic acid, phaseic acid and dihydrophaseic acid analysis by UPLC-US-MS/MS method - According to Vrhovsek et al 2012. and Pál et al. 2019, with modifications.

|                                                    |                                                        |                                        |               |                |                  |                        |               |                                |
|----------------------------------------------------|--------------------------------------------------------|----------------------------------------|---------------|----------------|------------------|------------------------|---------------|--------------------------------|
| UPLC:                                              | Waters Acquity I-class                                 |                                        |               |                |                  |                        |               |                                |
| Column:                                            | Waters HSS T3 column (1.8 μm, 100 mm × 2.1 mm) at 40°C |                                        |               |                |                  |                        |               |                                |
| inj vol.:                                          | 2 μl                                                   | Autosampler temperature:               |               | 10 °C          |                  |                        |               |                                |
| Gradient conditions                                |                                                        |                                        |               |                |                  |                        |               |                                |
| A: Water (0.1 v/v% formic acid)                    |                                                        | B: Acetonitrile (0.1 v/v% formic acid) |               |                |                  |                        |               |                                |
| Time (min)                                         | Flow rate (ml/min)                                     | A%                                     | B%            |                |                  |                        |               |                                |
| 0                                                  | 0.4                                                    | 95                                     | 5             |                |                  |                        |               |                                |
| 3                                                  | 0.4                                                    | 80                                     | 20            |                |                  |                        |               |                                |
| 4.3                                                | 0.4                                                    | 80                                     | 20            |                |                  |                        |               |                                |
| 9                                                  | 0.4                                                    | 55                                     | 45            |                |                  |                        |               |                                |
| 11                                                 | 0.4                                                    | 0                                      | 100           |                |                  |                        |               |                                |
| 13                                                 | 0.4                                                    | 0                                      | 100           |                |                  |                        |               |                                |
| 13.01                                              | 0.4                                                    | 95                                     | 5             |                |                  |                        |               |                                |
| 15                                                 | 0.4                                                    | 95                                     | 5             |                |                  |                        |               |                                |
| Detector:                                          |                                                        |                                        |               |                |                  |                        |               |                                |
| Xevo TQ-XS with Unispray source                    |                                                        |                                        |               |                |                  |                        |               |                                |
| Resolution:                                        | Unit mass (+/- 0.8 Da)                                 |                                        |               |                |                  |                        |               |                                |
| Impactor voltage:                                  |                                                        | 2 kV                                   |               |                |                  |                        |               |                                |
| Desolvation temperature:                           |                                                        | 550°C                                  |               |                |                  |                        |               |                                |
| Nebulizer gas:                                     |                                                        | 6.5 bar N <sub>2</sub>                 |               |                |                  |                        |               |                                |
| Desolvation gas flow:                              |                                                        | 1000 L/h N <sub>2</sub>                |               |                |                  |                        |               |                                |
| Cone gas flow:                                     |                                                        | 450 L/h N <sub>2</sub>                 |               |                |                  |                        |               |                                |
| Collision gas flow:                                |                                                        | 0.15 ml/min Argon 5.0                  |               |                |                  |                        |               |                                |
| Component name                                     | Unispray Impactor voltage polarity                     | quant. MS/MS transition                | Pred.RT (min) | RT found (min) | Cone voltage (V) | Collision ennergy (eV) | Calibrated to | QC                             |
| [2H6](+)-cis,trans-abscisic acid Internal standard | negative                                               | 269.1 > 159.1                          | 7.13          | 7.13           | 20               | 10                     | external      | spike recovery                 |
| abscisic acid                                      | negative                                               | 263.1 > 153                            | 7.18          | 7.16           | 20               | 10                     | external      | IS recovery and spike recovery |
| phaseic acid                                       | negative                                               | 279.12 > 139                           | 5.24          | 5.18           | 25               | 12                     | external      | spike recovery                 |
| dihydrophaseic acid                                | negative                                               | 281.14 > 237.2                         | 3.56          | 3.52           | 25               | 12                     | external      | spike recovery                 |

#### References:

Vrhovsek, U., Masuero, D., Gasperotti, M., Franceschi, P., Caputi, L., Viola, R., et al. (2012). A versatile targeted metabolomics method for the rapid quantification of multiple classes of phenolics in fruits and beverages. *J. Agric. Food Chem.* 60, 8831–8840. doi:10.1021/jf2051569.

Pál, M., Ivanovska, B., Oláh, T., Tajti, J., Hamow, K. Á., Szalai, G., et al. (2019). Role of polyamines in plant growth regulation of *Rht* wheat mutants. *Plant Physiol. Biochem.* 137, 189–202. doi:10.1016/j.plaphy.2019.02.013.
